# Supplementary material
Source: Springer Nature journal article supplement (https://www.springermedizin.de/resource/supplementary/12889_2009_1861_MOESM1_ESM.pdf/9504222)
Supplement: MOESM1 [file 9504222]

Search of AMED, Assia, CINAHL, Cochrane databases, EMBASE, MEDLINE, Psychinfo and others:

4713 titles and abstracts

Duplicate assessment of titles and abstracts lead to the following full text papers being obtained:

190 full text papers

Duplicate assessment of full papers lead to the following studies being included in the review:

32 studies (in 35 papers) included in review

Titles and abstracts that did not appear to relate to needs of people with CFS/ME:  
4523 titles and abstracts

Full papers did not relate to needs of people with CFS/ME:  
155 papers excluded
